# Supplementary material
Source: PubMed Central journal article supplement (PMC7237901)
Supplement: mmc1.pdf [file mmc1.pdf]

**Cell, Volume 181**

## **Supplemental Information**

### **Targets of T Cell Responses to SARS-CoV-2**

#### **Coronavirus in Humans with COVID-19**

#### **Disease and Unexposed Individuals**

**Alba Grifoni, Daniela Weiskopf, Sydney I. Ramirez, Jose Mateus, Jennifer M. Dan, Carolyn Rydyznski Moderbacher, Stephen A. Rawlings, Aaron Sutherland, Lakshmanane Premkumar, Ramesh S. Jadi, Daniel Marrama, Aravinda M. de Silva, April Frazier, Aaron F. Carlin, Jason A. Greenbaum, Bjoern Peters, Florian Krammer, Davey M. Smith, Shane Crotty, and Alessandro Sette**

**Table S1. Protein peptide pools (related to Figure 6)**

|                        | <b>Protein Name</b> | <b># of peptides</b> |
|------------------------|---------------------|----------------------|
|                        | M                   | 43                   |
|                        | N                   | 82                   |
|                        | S                   | 253                  |
|                        | E                   | 13                   |
| ORFs                   | ORF3a               | 53                   |
|                        | ORF7a               | 23                   |
|                        | ORF6                | 11                   |
|                        | ORF8                | 23                   |
| Nonstructural proteins | nsp1                | 36                   |
|                        | nsp2                | 127                  |
|                        | nsp3_part1          | 194                  |
|                        | nsp3_part2          | 194                  |
|                        | nsp4                | 100                  |
|                        | nsp5                | 61                   |
|                        | nsp6                | 58                   |
|                        | nsp7                | 17                   |
|                        | nsp8/9/10           | 91                   |
|                        | nsp12               | 186                  |
|                        | nsp13               | 120                  |
|                        | nsp14               | 105                  |
|                        | nsp15               | 70                   |
|                        | nsp16               | 50                   |
|                        | ORF10               | 6                    |
|                        | total               | 1916                 |

**Table S2. Immune cell lineage and phenotyping panel (related to Figure 1)**

| Marker-Fluorophore  | Clone    | Vendor     | Catalog #  |
|---------------------|----------|------------|------------|
| KI67-FITC           | B56      | BD         | 556026     |
| CD4-percp efluor710 | SK3      | Invitrogen | 46-0047-42 |
| Gzm B- af647        | GB11     | Biolegend  | 515406     |
| IgM- af700          | MHM-88   | Biolegend  | 314538     |
| CD27-APCcy7         | O323     | Biolegend  | 302816     |
| IgD- PE             | IA6-2    | BD         | 555779     |
| CD56- PE Dazzle     | HCD56    | Biolegend  | 318348     |
| CD19 PE-Cy5         | H1B19    | Biolegend  | 302210     |
| CD38- PECy7         | HIT2     | Invitrogen | 25-0389-42 |
| CXCR5-bv421         | J252D4   | Biolegend  | 356920     |
| CD14- bv510         | 63D3     | Biolegend  | 367123     |
| CD45RA- bv570       | HI100    | Biolegend  | 304132     |
| CXCR3- bv605        | G025H7   | Biolegend  | 353728     |
| CD20- bv650         | 2H7      | Biolegend  | 302336     |
| CCR7-bv711          | G043H7   | Biolegend  | 353228     |
| PD-1-bv786          | EH12.2H7 | Biolegend  | 329930     |
| CD3- buv395         | UCHT1    | BD         | 563546     |
| Zombie UV           | N/A      | Biolegend  | 423108     |
| CCR6-buv496         | 11A9     | BD         | 612948     |
| CD16-buv737         | 3G8      | BD         | 612786     |
| CD8- buv805         | SK1      | BD         | 612889     |

**Table S3. Known annotated coronavirus T cell epitopes (related to Figure 6)**

| <b>Antigen</b>     | <b>No. of coronavirus epitopes (% total)</b> |            |
|--------------------|----------------------------------------------|------------|
|                    | <b>CD4</b>                                   | <b>CD8</b> |
| Spike glycoprotein | 77 (62%)                                     | 65 (50%)   |
| Nucleoprotein      | 34 (27%)                                     | 46 (36%)   |
| Membrane protein   | 6 (5%)                                       | 6 (5%)     |
| Orf1ab             | 2 (2%)                                       | 9 (7%)     |
| Orf3a              | 5 (4%)                                       | 2 (2%)     |
| Envelope protein   | 0 (0%)                                       | 1 (1%)     |
| <b>Total</b>       | <b>124</b>                                   | <b>129</b> |

**Table S4. AIM antibody panel (related to Figures 2,3 and 6)**

| <b>Antibody</b>      | <b>Fluorochrome</b> | <b>Clone/vendor/catalog</b>      | <b>Amount per well</b> |
|----------------------|---------------------|----------------------------------|------------------------|
| CD14-CD19- Live/Dead | V500                | M5E2/BD/561391 - HIB19/BD/561121 | 2 each- 0.5            |
| CD4                  | BV605               | FN50/BD/562989                   | 3                      |
| CD8                  | BV650               | RPA-T8/BioLegend/301042          | 2                      |
| CD69                 | PE-CF594            | FN50/BD/562617                   | 2                      |
| OX40                 | PE-Cy7              | Ber-ACT35/Biolegend/350012       | 2                      |
| CD137                | APC                 | 4B4-1/BioLegend/309810           | 2                      |
| CD3                  | AF700               | OKT3/Biolegend/317340            | 2                      |

**Table S5. ICS antibody panel (related to Figure 3)**

| <b>Antibody</b>      | <b>Fluorochrome</b> | <b>Clone/vendor/catalog</b>      | <b>Amount per well</b> |
|----------------------|---------------------|----------------------------------|------------------------|
| CD45RA               | BV421               | G043H7/BioLegend/                | 3                      |
| CD14-CD19- Live/Dead | V500                | M5E2/BD/561391 - HIB19/BD/561121 | 2 each- 0.5            |
| CD4                  | BV605               | FN50/BD/562989                   | 3                      |
| CD8                  | BV650               | RPA-T8/BioLegend/301042          | 2                      |
| IFN $\gamma$         | PerCP Cy5.5         | 4S.B3/eBioscience/45-7319-42     | 4                      |
| Granzyme B           | PE-CF594            | GB11/BD/562462                   | 3                      |
| TNF $\alpha$         | PeCy7               | Mab11/eBioscience/25-7349-82     | 1                      |
| IL-10                | APC                 | JES3-19F1/BioLegend/506807       | 5                      |
| CD3                  | AF700               | OKT3/Biolegend/317340            | 2                      |
| CCR7                 | APC ef780           | 3D12/eBioscience/47-1979-42      | 5                      |
